# Supplementary material
Source: publisher figshare collection journal article supplement (https://acs.figshare.com/ndownloader/files/9677869)
Supplement: Supplementary file 1 [file 9677869]

Supporting Information of

Highly efficient dual active palladium nanonetwork electrocatalyst for ethanol  
oxidation and hydrogen evolution

Halima Begum, Mohammad Shamsuddin Ahmed, Seungwon Jeon\*

Department of chemistry and institute of basic science, Chonnam National University, Gwangju  
500-757, Republic of Korea.

Tel.: +82 62 530 0064; fax: +82 62 530 3389.

\*Corresponding author: [swjeon3380@naver.com](mailto:swjeon3380@naver.com)

### *Physical parameters characterization*

Transmission electron microscopy (TEM) images, energy-dispersive X-ray spectroscopy (EDX) and selected area electron diffraction (SAED) were obtained by TECNAI model FI-20 (FEI, Netherland). Brunauer-Emmett-Teller (BET) surface area and pore size distribution were obtained through the Barrett-Joyner-Halenda method by nitrogen isotherm adsorption and desorption (BelsorpII mini, BEL Japan Inc.). X-ray powder diffraction (XRD) spectra were carried out on a Rigaku D/max-2500, using filtered Cu K $\alpha$  radiation. X-ray photoelectron spectroscopy (XPS) were gained using a MultiLab 2000 with a 14.9 keV Al K X-ray source.

### *Electrochemical characterization*

The 1 mg mL<sup>-1</sup> PdNN suspension in water was prepared by sonication. A 10  $\mu$ L portion of the PdNN suspension was then dropped onto the prepolished glassy carbon electrode (GCE). Other prepared catalysts, PdNPs and PdZnNN-coated GCEs were prepared by the same protocol. The 10  $\mu$ L of 20% Pt/C (E-TEK) suspension in ethanol (1 mg mL<sup>-1</sup> with 5  $\mu$ L of 5% Nafion solution) was dropped onto GCE. The loading amount of Pd for the PdNN, PdNPs and PdZnNN catalysts was 16.9, 22.6, 25.5  $\mu$ g<sub>Pd</sub> cm<sup>-2</sup>, respectively, and Pt loading for Pt/C catalyst was 28.3  $\mu$ g<sub>Pt</sub> cm<sup>-2</sup>, normalized to the geometric electrode area (0.0707 cm<sup>2</sup>). All electrochemical techniques were performed using a three-electrode potentiostat [CHI 700C electrochemical workstation (U.S.A.)]. A Pt wire and Ag/AgCl electrodes were used as auxiliary electrode and reference electrode, respectively. The rotating disk electrode (RDE) was used for HER using an EG&G Model 636 RDE system along with the CHI 700C. All electrochemical experiments were performed in high purity argon (Ar)-purged (for at least 30 min) 1 M KOH solutions at room temperature (RT).

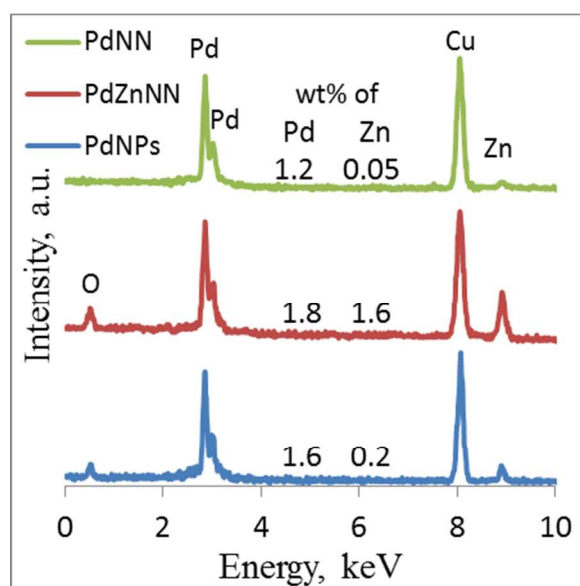

**Figure S1:** EDX spectra of PdNN, PdNPs, and PdZnNN catalysts.

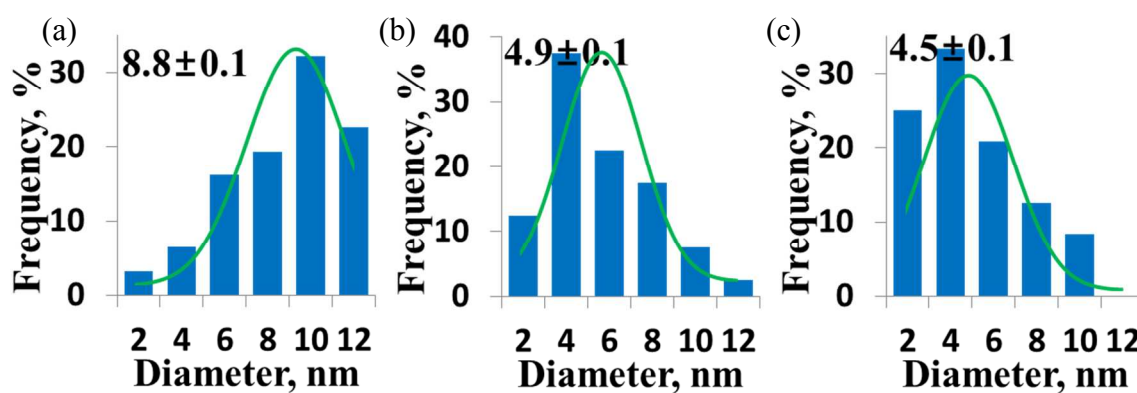

**Figure S2:** The diameter size histograms of PdNN prepared using CTAB concentrations of 40 mM (a) 80 mM (b) and 120 mM (c).

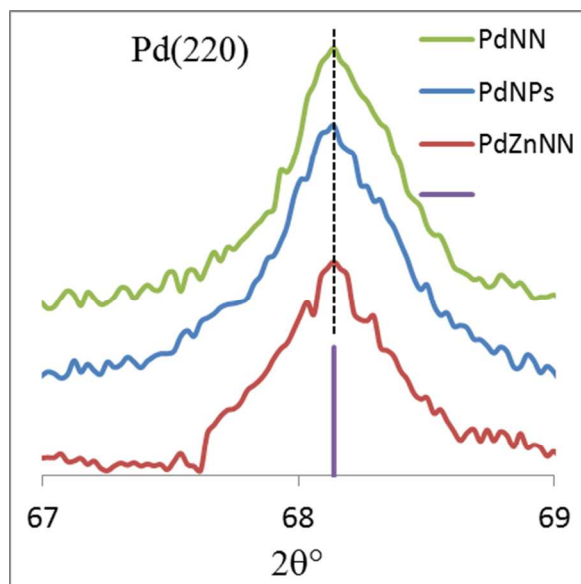

**Figure S3:** Enlarged XRD patterns of PdNN, PdNPs, and PdZnNN at Pd(220) region.

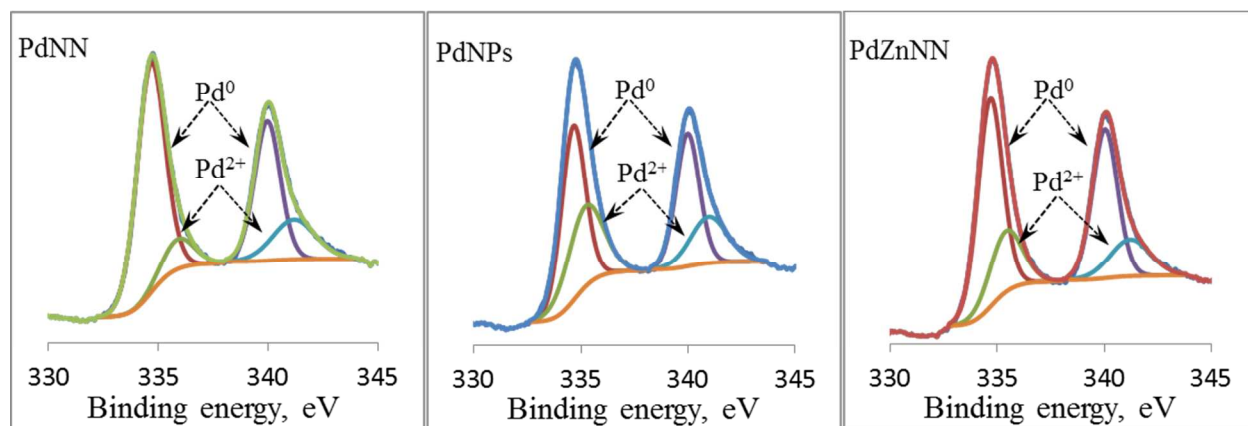

**Figure S4:** The core level of Pd3d XPS spectra for all samples.

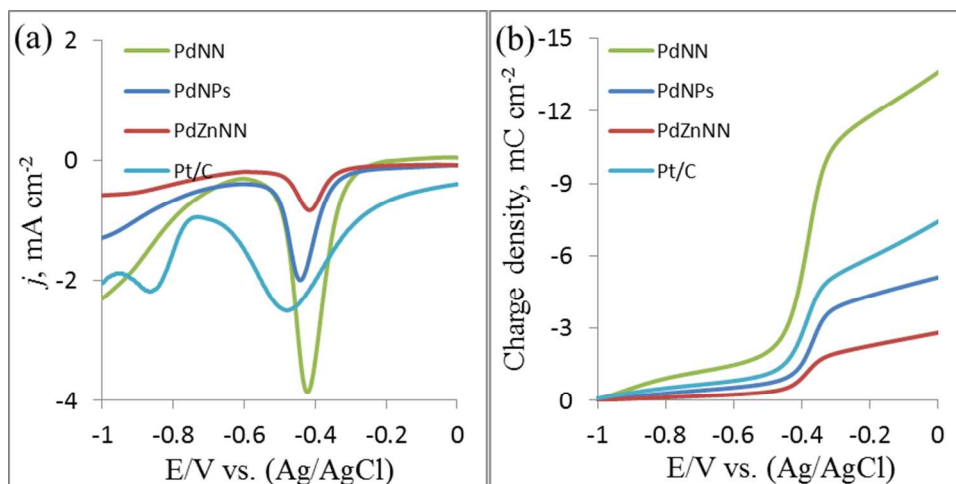

**Figure S5:** Backward scan of CVs on PdNN, PdNPs, PdZnNN and Pt/C recorded in Ar-saturated 1 M KOH electrolyte at a scan rate of  $50 \text{ mV s}^{-1}$  (a) and the corresponding charge density variation (b).

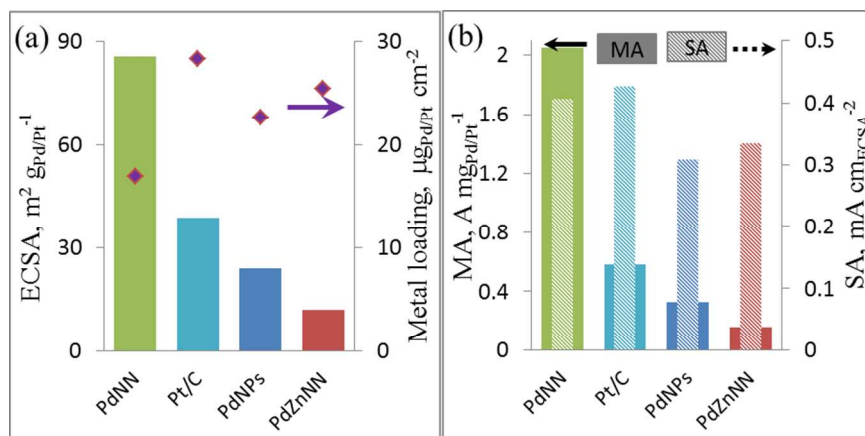

**Figure S6:** The plots of Pd/Pt loading and corresponding ECSA (a) and mass activity with specific activity (b) of PdNN, PdNPs, PdZnNN and Pt/C catalysts.

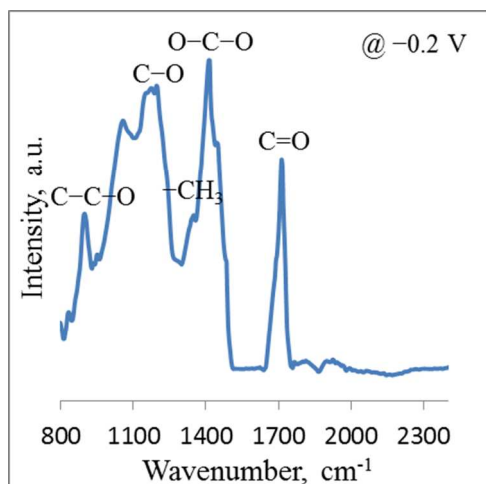

**Figure S7:** Single potential alteration infrared reflectance spectroscopy of the species resulting from the oxidation of ethanol in Ar-saturated 1 M KOH + 1 M ethanol solution at the PdNN.

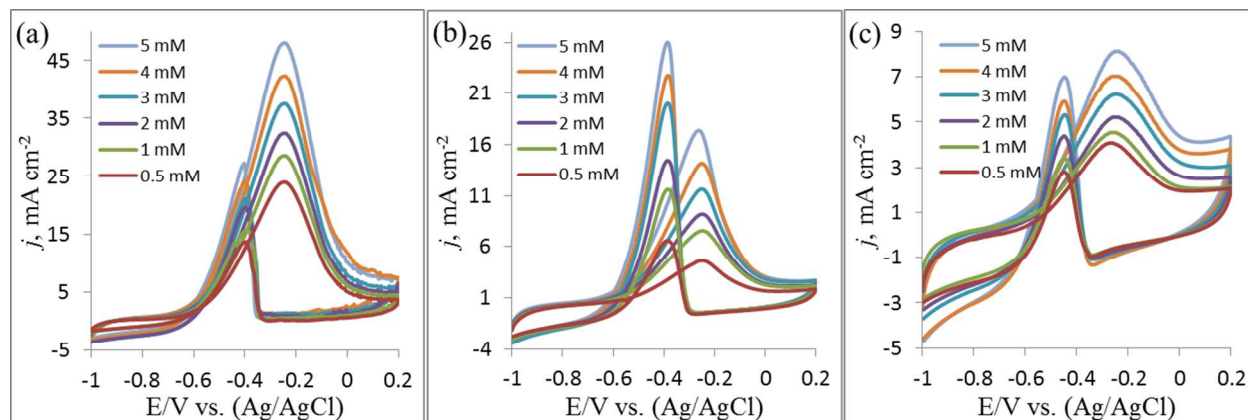

**Figure S8:** CVs for EOR on PdNN (a), PdNPs (b), and PdZnNN (c) recorded in Ar-saturated 1 M KOH electrolyte in presence of various concentration of ethanol at a scan rate of  $50 \text{ mV s}^{-1}$ .

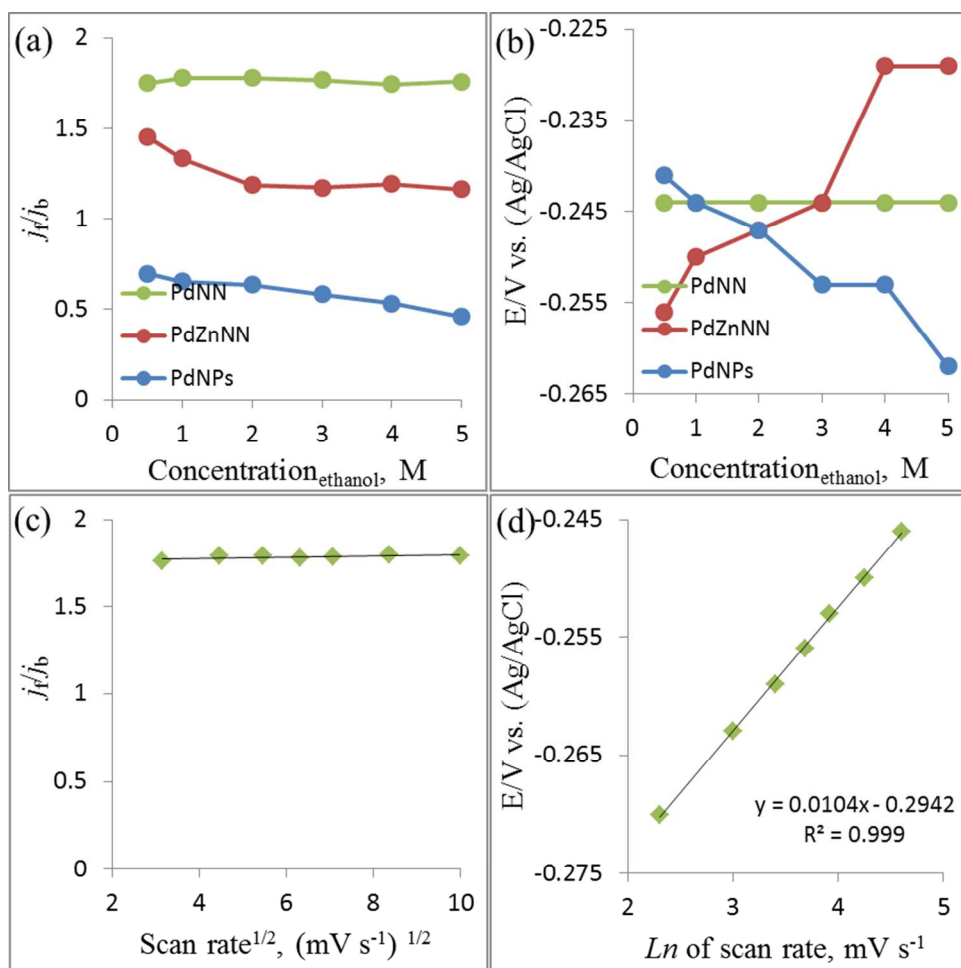

**Figure S9:** Plots of  $J_f/J_b$  (a) as well as  $J_f$  variation (b) as the function of ethanol concentration for PdNN, PdNPs and PdZnNN; the plot of  $J_f/J_b$  vs. square root of scan rate (c) and  $J_f$  shift vs.  $\ln$  of scan rates (d) on PdNN-modified electrode.

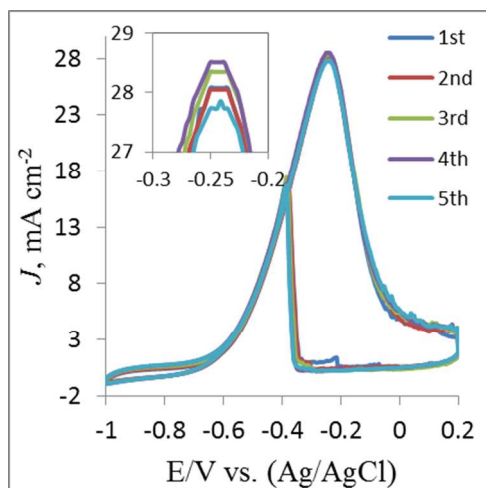

**Figure S10:** CV curves for EOR on five different PdNN-modified electrodes in Ar-saturated 1 M KOH electrolyte containing 1 M EtOH with current density normalized to electrode area; inset: the enlarged CV curves for better view.
